# Supplementary material for: Natural Course and Prognostic Factors of Ethambutol Toxic Optic Neuropathy
Source: Research Square preprint supplement (doi:10.21203/rs.3.rs-76098/v1), 2020-10-26
Supplement: Supplementary file 1 [file 04ec5ed5bf547b32ab609a3f.xlsx]

## Sheet: Sheet1
번호	Sex	age	onset	initial VA OD	initial VA OS	worse eye	LogMAR	final VA OD	final VA OS	recovery OD	recovery OS	Recover	FU	other diseases	VF	OCT	Final visit	VEP	pERG	medications
1	1	91	기록없음	0.7	0.2	0.7	0.2/0.6	1.4	1.22	-0.7	-1.02	2	2	2	o	o	2011-09-05	o	x	임파선결핵약 혈압약
2	1	91	4	3	2	3	H.M/F.C(sc)							1	o	o	2010-04-20	o	x	결핵약
3	2	87	10	4	2	4	F.C10cm/L.P(+)	2	2	2	0	2	8	1	x	x	2011-06-20	x	x	결핵약
4	1	81	미상	1.5	2	2	0.04/FC	2	1.4	-0.5	0.6	2	5	2	x	o	2016-10-14	x	x	신경안정제 결핵약
5	1	80	9	1	1.4	1.4	0.1/0.04	1	1.4	0	0	2	x	2	o	o	2015-12-09	x	x	결핵약
6	2	78	미상	2	1.8	2	F.C/0.02	2	0.3	0	1.5	1	70	3	x	o	2011-10-31	x	x	척추결핵약(탐부톨 400mg 2알)	800
7	1	76	5	1.22	0.8	1.22	0.06/0.15	1	1	0.22	-0.2	1	11	1	o	o	2009-04-14	o	x	결핵약
8	1	75	6	0.7	0.7	0.7	0.2							2	0.2	o	2013-02-19	x	x	결핵약
9	1	74	6	0.5	0.4	0.6	0.3/0.4	0.15	0.15	0.35	0.25	1	17	1	o	o	2011-10-07	x	x	결핵약(마이암부톨? 2알)	800
10	2	74	4	1.7	1.4	1.7	0.02/0.04	1.7	1.4	0	0	2	4	3	o	o	2012-07-13	o	x	결핵약
11	2	70	7	0.4	1	1	0.4/0.1							1	o	x	2016-04-28	o	x	결핵약
12	1	65	3	1.7	1.4	1.7	0.02/0.04	2	2	-0.3	-0.6	2	24	3	o	o	2012-08-13	o	x	결핵약(마이암부톨 2알)	800
13	1	63	3	1	0.5	1	0.1/0.3	0.5	0.5	0.5	0	1	16	1	o	o	2016-11-07	x	x	결핵약 기관지확장증약
14	1	63	10yr	1.4	1	1.4	0.04/0.1	2	1	-0.6	0	2	2	1	o	o	2012-09-19	o	o	미상
15	2	63	기록없음	0.3	0.15	0.3	0.5/0.7	0.1	0,1	0.2	0.05	1	60	3	o	o	2014-09-25	x	x	결핵약
16	2	61	미상	0.7	1.22	1.22	0.2/0.06	0.7	1.3	0	-0.08	2	2	3	o	o	2008-12-24	o	x	결핵약 심혈관약 당뇨약 루푸스
17	2	60	5	1	1.7	1.7	0.1/0.02	1	1.7	0	0	2	1	1	o	o	2016-06-23	x	o	결핵약(탐부톨 3알)	1200
18	2	54	8	0.15	0.4	0.4	0.7/0.4	0.1	0.4	0.05	0	1	2	1	o	o	2013-01-10	x	x	결핵약
19	1	52	기록없음	1	1.7	1.7	0.1/0.02(sc)							3	o	o	2011-01-21	o	o	결핵약 알코올
20	1	91	기록없음	1.7	2	2	0.02/F.C	0.22	0.4	1.48	1.6	1	5	1	x	o	2013-04-22	x	x	결핵약
21	2	88	9	1.4	1.22	1.4	0.06/0.04	0.4	0.22	1	1	1	6	2	o	o	2013-07-16	o	o	결핵약
22	2	80	2	0.7	0.7	0.7	0.2/0.2	0.1	0.1	0.6	0.6	1	10	3	o	o	2014-06-17	o	x	결핵약(마이코박테리움 에이비움 마이암부톨 리팜핀)
23	2	80	11	1.3	1.7	1.7	0.05/0.02							1	o	o	2011-10-24	o	o	결핵약(탐부톨)
24	1	79	6	1	1.4	1.4	0.1-/0.04	1	1.4	0	0	2	3	2	o	o	2012-09-17	o	o	결핵약(탐부톨)
25	2	77	6	1	2	2	0.1/F.C	1	1.8	0	0.2	1	16	1	o	o	2015-12-22	o	x	결핵약
26	1	77	12	0.7	1	1	0.2/0.1	0.1	0.1	0.6	0.9	1	26	1	o	o	2016-06-10	x	x	결핵약
27	2	76	8	1.22	1.52	1.52	0.06/0.03	0.3	1	0.92	0.52	1	48	1	o	x	2016-10-05	x	x	결핵약
28	2	76	6	0.7	1	1	0.2/0.1	0.25	0.5	0.45	0.5	1	5	2	o	o	2016-07-14	x	x	결핵약
29	1	75	미상	0.7	0.7	0.7	0.2/0.2							1	o	o	2014-12-26	o	o	결핵약(마이암부톨)
30	2	74	6	1	1	1	0.1/0.1(sc)	0.3	0.3	0.7	0.7	1	9	1	o	x	2010-06-01	x	x	결핵약
31	2	74	백내장 수술후(우안:한달반후, 좌안:바로)	1.6	1.6	1.6	0.03/0.03	0.3	0.4	1.3	1.2	1	7	2	o	x	2010-10-01	x	o	결핵약
32	1	72	6	1.1	1.22	1.2	0.08/0.06	1.1	1.1	0	0.12	2	1	3	o	o	2016-12-15	x	o	결핵약
33	2	72	7	1.22	1.7	1.7	0.06/0.02							1	o	o	2012-06-13	o	x	결핵약
34	2	72	5	1.22	1.6	1.6	0.06/0.03	0.3	0.22	0.92	1.38	1	60	1	o	o	2015-07-16	x	x	결핵약(EMB 1200mg) 호흡기약 신경과약	1200
35	1	72	4	2	2	2	F.C/F.C	0.7	0.7	1.3	1.3	1	3	2	o	o	2010-08-17	x	x	결핵약
36	2	71	미상	1.22	1.22	1.22	0.06/0.06	0.22	0.3	1	0.92	1	18	3	o	o	2016-09-19	o	x	결핵약
37	2	70	6	0.7	0.4	0.7	0.1/0.48	0.05	0.1	0.65	0.3	1	31	2	o	o	2015-05-26	x	o	결핵약(탐부톨 2알)	800
38	2	70	8	1	1.22	1.22	0.1/0.06	0.1	0.1	0.9	1.12	1	3	1	o	o	2016-09-27	x	o	결핵약
39	1	70	5	1	1	1	0.1/0.1	0.1	0.1	0.9	0.9	1	18	3	o	o	2014-08-25	o	o	결핵약
40	1	69	미상	0.7	2	2	0.02/0.02	0.3	0.5	0.4	1.5	1	36	3	o	o	2013-10-25	o	x	미상
41	2	67	미상	1.22	0.7	1	0.06/0.2	0.1	0.1	1.12	0.6	1	70	2	o	o	2010-12-28	o	x	마이암부톨
42	1	64	6	1	2	2	0.1/F.C	0.22	0.3	0.78	1.7	1	19	2	o	o	2016-10-12	o	x	결핵약
43	2	64	3	0.5	1.22	1.22	0.48/0.06	0.3	0.48	0.2	0.74	1	4	3	o	o	2014-07-23	x	x	결핵약, 고지혈증약
44	2	64	4	1	1.4	1.4	0.1/0.04	0.2	0.3	0.8	1.1	1		1	x	o	2015-07-24	o	x	결핵약
45	2	61	6	1	1	1	0.1/0.1	0.2	0.3	0.8	0.7	1		1	o	o	2016-10-11	x	o	결핵약(암부톨 1200mg)	1200
46	2	61	24	0.48	0.48	0.48	0.48/0.48	0.1	0.1	0.38	0.38	1		1	o	o	2016-01-25	x	x	결핵약
47	2	61	10	0.5	0.4	0.5	0.5/0.4	0.1	0.2	0.4	0.2	1		1	o	x	2013-07-17	x	x	결핵약
48	2	58	6	0.4	1	1	0.4/0.1	0.1	0.1	0.3	0.9	1		1	o	o	2010-12-13	o	o	결핵약
49	1	54	1	1.6	2	2	0.03/F.C	1.3	1.3	0.3	0.7	1		1	o	o	2016-11-10	o	x	결핵약
50	1	51	20yr	1	1	1	0.1/0.1	0.7	1	0.3	0	1		1	o	x	2011-04-11	o	o	결핵약(20년전)
51	2	50	8	0.7	0.7	0.7	0.2/0.2	0.7	0.3	0	0.4	1		1	o	o	2015-05-01	x	o	결핵약(EMB 3알(1200mg))	1200
52	1	49	기록없음	1.4	1.2	1.4	0.04-/0.08	0.7	0.3	0.7	0.9	1		1	o	o	2012-07-10	o	o	기록없음
53	2	26	미상	2	1	2	F.C/1.0	2	0.1	0	0.9	1		1	x	x	2016-10-14	x	x	결핵약
54	2	89	4	0.48	1	1	0.48/0.1							1	o	x	2009-12-01	x	x	결핵약
55	2	87	6	2	2	2	F.C/F.C							1	x	x	2015-10-21	x	o	결핵약
56	2	86	5	2	2	2	F.C/F.C	2	2	0	0			1	x	o	2011-03-04	x	x	결핵약
57	2	82	3	4	3	4	L.P(+)/H.M			4	3			1	x	o	2015-04-03	x	x	결핵약(EMB 3알 1200mg)	1200
58	2	82	6	1.4	2	2	0.04-/F.C			1.4	2			1	x	x	2013-09-14	x	x	결핵약
59	1	80	미상	1.4	1	1.4	0.04/0.1-			1.4	1			1	x	o	2014-02-08	x	x	결핵약
60	2	79	4	3	3	3	H.M/H.M			3	3			2	o	o	2013-05-29	x	x	에탐부톨 뇌경색약
61	1	78	5	1	1	1	0.1/0.1			1	1			1	o	o	2013-05-31	x	x	결핵약
62	2	75	10	2	1.8	2	F.C/0.02			2	1.8			1	x	o	2015-03-19	x	x	결핵약
63	2	72	5	0.48	1.4	1.4	0.48/0.06			0.48	1.4			1	o	o	2016-12-27	x	x	결핵약 치매예방약 우울증예방약
64	2	72	5	0.48	2	2	0.48/F.C			0.48	2			1	o	x	2012-06-11	x	x	결핵약
65	2	71	4	0.15	0.15	0.15	0.9/0.9-			0.15	0.15			1	x	x	2012-09-13	x	x	결핵약(INH, RFP, EMB, PRA)
66	2	69	10	0.7	0.7	0.7	0.2/0.2			0.7	0.7			1	o	x	2010-01-18	x	x	척추결핵약
67	2	66	5	1.7	1.4	1.7	0.02/0.06	0.2	0.1	1.5	1.3			1	o	o	2016-05-25	x	o	결핵약
68	1	65	3	0.4	0.48	0.48	0.4/0.5			0.4	0.48			3	o	o	2008-05-05	x	x	결핵약
69	1	65	미상	1.7	2	2	0.02/F.C			1.7	2			1	o	o	2013-07-09	o	x	결핵약
70	1	64	6	0.7	0.7	0.7	0.2/0.2			0.7	0.7			2	o	o	2008-12-29	x	x	결핵약
71	2	62	4	0.7	1.8	1.8	0.2/0.02			0.7	1.8			1	o	o	2012-02-06	x	x	결핵약
72	1	61	5	2	1.6	2	F.C/0.03			2	1.6			2	x	o	2010-09-24	x	x	당뇨 결핵약(EMB 2-3알)	1200
73	2	60	4	1.4	2	2	0.04/F.C			1.4	2			1	o	o	2016-07-29	x	x	결핵약
74	2	60	7	0.5	0.1	0.5	0.5-/0.8			0.5	0.1			1	x	x	2011-08-30	x	x	결핵약
75	1	60	9	1	0.7	1	1.0/0.2			1	0.7			1	o	x	2011-03-02	x	x	결핵약
76	1	60	1	0.48	0.4	0.48	0.48/0.4	1	1	-0.52	-0.6			1	o	x	2009-03-18	o	x	결핵약
77	2	58	5	1.3	0.48	1.3	0.06/0.48			1.3	0.48			3	o	o	2016-09-19	x	o	결핵약(마이암부톨 400mg)	400
78	1	58	6	1.4	1.4	1.4	0.04/0.04			1.4	1.4			2	x	o	2013-08-30	x	x	결핵약 한약
79	1	58	8	0.7	0.7	0.7	0.2/0.2			0.7	0.7			1	o	o	2009-12-01	x	x	결핵약
80	2	57	5	0.7	0.7	0.7	0.2/0.2			0.7	0.7			2	x	x	2012-04-02	x	x	결핵약
81	2	57	9	1.6	1	1.6	0.05/0.05			1.6	1			1	o	x	2009-03-16	o	x	결핵약
82	1	55	6	0.4	0.48	0.48	0.5/0.5			0.4	0.48			1	o	o	2013-03-11	x	x	결핵약(EMB 3알)	1200
83	2	54	6	1.4	1.4	1.4	0.04/0.06			1.4	1.4			1	x	x	2016-12-02	x	x	결핵약
84	1	54	5	1	0.1	1	1.0/0.9			1	0.1			1	x	x	2012-12-18	x	x	결핵약
85	2	50	3	3	3	3	H.M/H.M			3	3			1	o	o	2014-10-01	x	x	결핵약
86	1	48	4	1.6	2	2	0.05/F.C			1.6	2			1	x	o	2011-11-19	x	x	결핵약
87	1	25	5	2	2	2	F.C/F.C			2	2			1	o	o	2016-07-18	x	o	결핵약
